# Supplementary material for: Sonochemical synthesis of polyoxometalate-stabilized gold nanoparticles for point-of-care determination of acetaminophen levels: preclinical study in an animal model
Source: Royal Society of Chemistry journal article supplement (doi:10.1039/d0ra00931h), 2020-01-01
Supplement: d0ra00931h1.pdf [file d0ra00931h1.pdf]

## Supplementary Information

### **Sonochemical synthesis of polyoxometalate-stabilized gold nanoparticles for point-of-care determination of acetaminophen levels: preclinical study in animal model**

Tahereh Rohani Bastami<sup>\*a,b</sup>, Abolphazl Ghaedi<sup>c</sup>, Scott G. Mitchell<sup>d</sup>, Aida Javadian-Saraf<sup>e</sup>,  
Mohammad Karimi<sup>f</sup>

a) Department of Chemical Engineering, Quchan University of Technology, Quchan 94771-67335, Iran.

b) Research and Technology Center of Biomolecules, Faculty of Science, Ferdowsi University of Mashhad, Mashhad, Mashhad, 9177948974, Iran.

c) Department of Chemical Engineering, Quchan University of Technology, Quchan 94771-67335, Iran.

d) Instituto de Ciencia de Materiales de Aragón (ICMA), Consejo Superior de Investigaciones Científicas (CSIC)-Universidad de Zaragoza and CIBER-BBN, C/ Pedro Cerbuna 12, 50009 Zaragoza, Spain.

e) School of Engineering, University of British Columbia, Kelowna, BC, V1V 1V7, Canada.

f) Department of Emergency Medicine, Faculty of Medicine, Ahvaz Jundishapur University of Medical Sciences, Ahvaz, Iran.

**Table 4**

**Figure 4**

**Table S1:** Physicochemical properties of acetaminophen.

| <b>Drug</b>           | <b>Chemical name and formula</b>                                          | <b>Structure</b>                                                                  | <b>So H2O<br/>(25°C<br/>mg.mL<sup>-1</sup>)</b> | <b>pKa</b> |
|-----------------------|---------------------------------------------------------------------------|-----------------------------------------------------------------------------------|-------------------------------------------------|------------|
| Acetaminophen<br>(AP) | 4-hydroxyacetanilide<br><br>C <sub>8</sub> H <sub>9</sub> NO <sub>2</sub> | 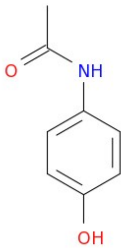 | 14                                              | 9.5        |

**Table S2.** The most important IR vibrations for PMo<sub>12</sub> and AuNPs@PMo<sub>12</sub> nano-hybrid.

| <b>Band assignment</b>        | <b>Observed band (cm<sup>-1</sup>)<br/>AuNPs@PMo<sub>12</sub></b> | <b>Observed band (cm<sup>-1</sup>)<br/>PMo<sub>12</sub></b> |
|-------------------------------|-------------------------------------------------------------------|-------------------------------------------------------------|
| <b>v<sub>as</sub> (P-O)</b>   | 1080                                                              | 1060                                                        |
| <b>v<sub>as</sub> (Mo-Od)</b> | 1033                                                              | 966                                                         |
| <b>v (Mo-Ob-Mo)</b>           | ---                                                               | 876                                                         |
| <b>v (Mo-Oc-Mo)</b>           | 619                                                               | 796                                                         |
| <b>δ H2O</b>                  | 1660                                                              | 1600                                                        |
| <b>v OH</b>                   | 3430                                                              | 3400                                                        |

**Table S3.** Effect of temperature on maximum absorbance of AuNPs@ PMo<sub>12</sub> nano-hybrid upon addition of AP (synthesis condition: intensity= 26 Wcm<sup>-2</sup>, Au: POM ratio (1:2)).

| Sample                   | Maximum Absorbance, nm |        |        |
|--------------------------|------------------------|--------|--------|
|                          | 27±1°C                 | 37±1°C | 47±1°C |
| AuNPs@ PMo <sub>12</sub> | 533                    | 538    | 550    |
| AuNPs + 30 mg/L          | 559                    | 572    | 612    |
| AuNPs + 70 mg/L          | 565                    | 588    | 650    |

**Table S4:** Effect of acoustic intensity on maximum absorbance of AuNPs@ PMo<sub>12</sub> nano-hybrid upon addition of AP (synthesis condition; T=37±1°C, Au: POM ratio (1:2)).

| Sample                   | Maximum Absorbance, nm |                      |                        |
|--------------------------|------------------------|----------------------|------------------------|
|                          | 21 Wcm <sup>-2</sup>   | 26 Wcm <sup>-2</sup> | 30.5 Wcm <sup>-2</sup> |
| AuNPs@ PMo <sub>12</sub> | 537                    | 541                  | 550                    |
| AuNPs + 30 mg/L          | 558                    | 556                  | 570                    |
| AuNPs + 70 mg/L          | 568                    | 607                  | 593                    |

**Table S5:** Effect of Au: POM ratio on maximum absorbance of AuNPs@ PMo<sub>12</sub> nanohybrid upon addition of AP (synthesis condition; intensity= 26 Wcm<sup>-2</sup>, T=37±1°C).

| Material                 | Maximum Absorbance, nm |          |          |
|--------------------------|------------------------|----------|----------|
|                          | Au1:POM2               | Au1:POM1 | Au2:POM1 |
| AuNPs@ PMo <sub>12</sub> | 543                    | 541      | 552      |
| AuNPs + 30 mg/L          | 554                    | 545      | 552      |
| AuNPs + 70 mg/L          | 602                    | 566      | 559      |

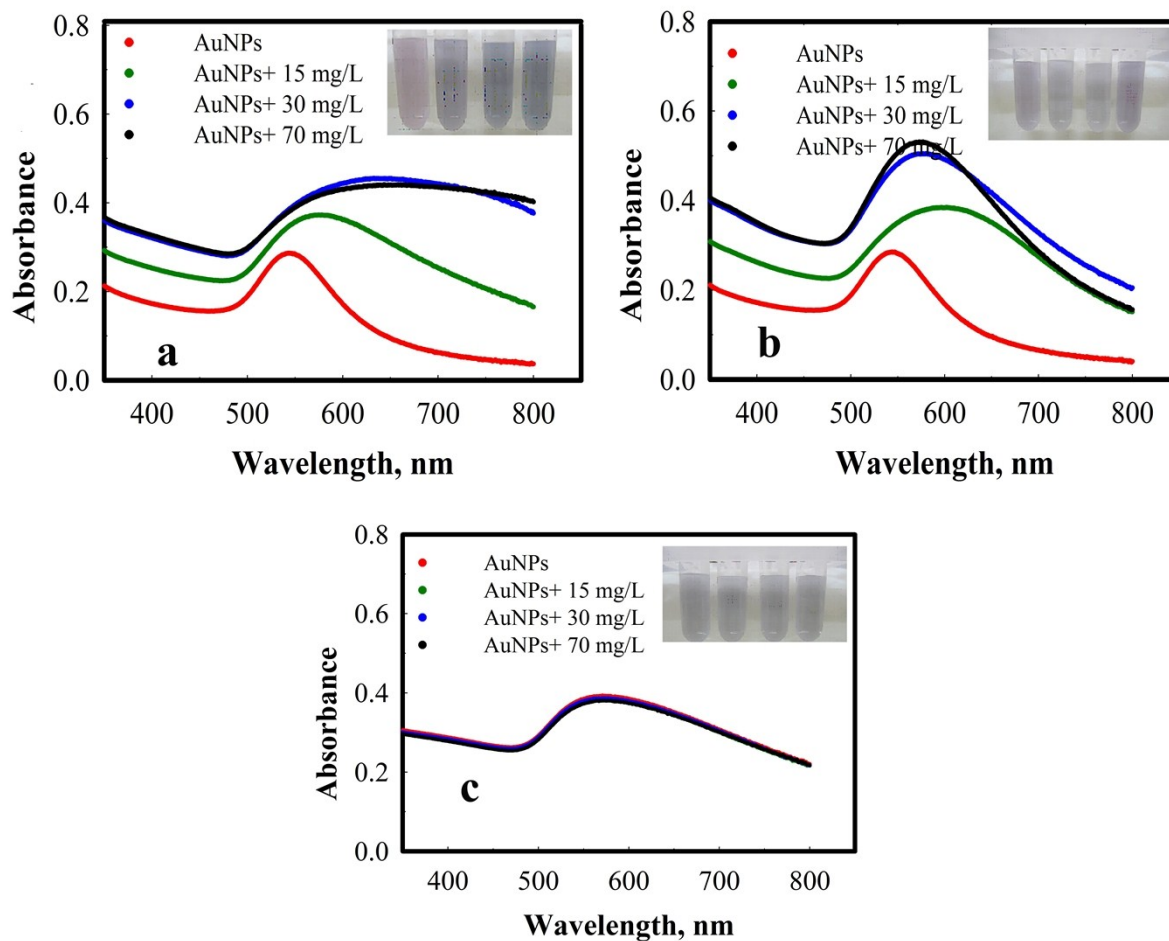

**Fig.S1.** a) UV-visible absorption spectra of AuNPs@ PMo<sub>12</sub> upon addition of AP solution at a) pH 6.0±0.5, b) pH 9.0±0.5, c) pH 12.0±0.5. Photographic images from left to right (AuNPs@ PMo<sub>12</sub>+0 mg/L, AuNPs@ PMo<sub>12</sub>+15 mg/L, AuNPs@ PMo<sub>12</sub>+30 mg/L, and AuNPs@ PMo<sub>12</sub>+70mg/L) (synthesis condition; intensity: 26 Wcm<sup>-2</sup>, T=37±1°C, Au:POM ratio (1:2)).

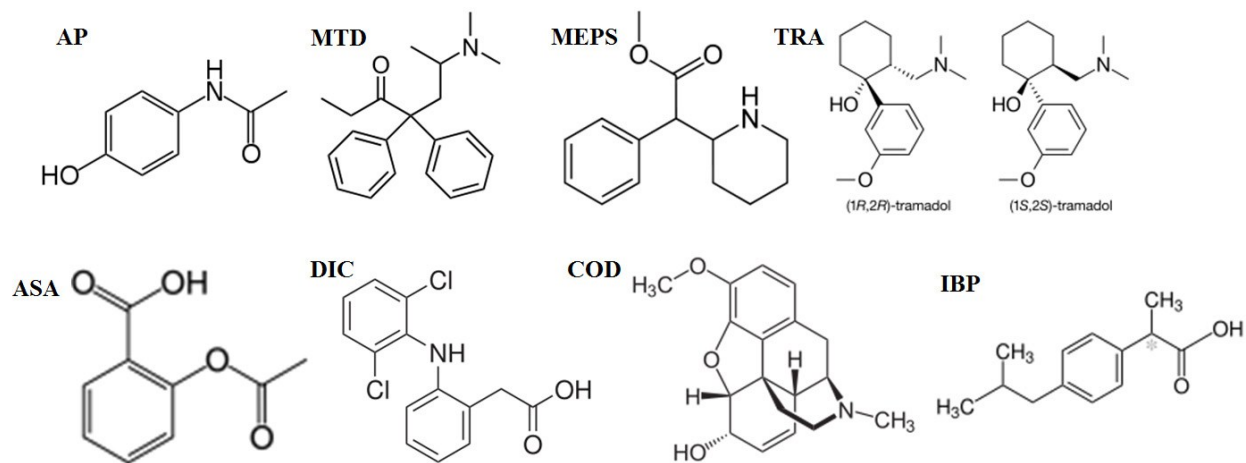

**Fig.S2. Chemical structures of drugs**

### **Diagnostic accuracy of the nanosensor**

Regarding checking the accuracy of the nanosensor after making 300 standard samples, 100 of which were prepared with concentrations more than 100  $\mu\text{g/mL}$ , 100 with concentrations of 25-100  $\mu\text{g/mL}$ , and 100 with concentrations less than 25  $\mu\text{g/mL}$  and using the area under the ROC curve, it was found that in detection of toxic cases, this nanosensor had 0.972 area under the ROC curve, 99% sensitivity, 97% specificity, 94.28% positive predictive value and 99.48% negative predictive value (Fig. S2). In detection of non-toxic cases, this nanosensor had also 0.969 area under the ROC curve, 92% sensitivity, 98.5% specificity, 96.84% positive predictive value and 96.09% negative predictive value (Figure S3). All these findings confirm the very high diagnostic accuracy of the nanosensor.

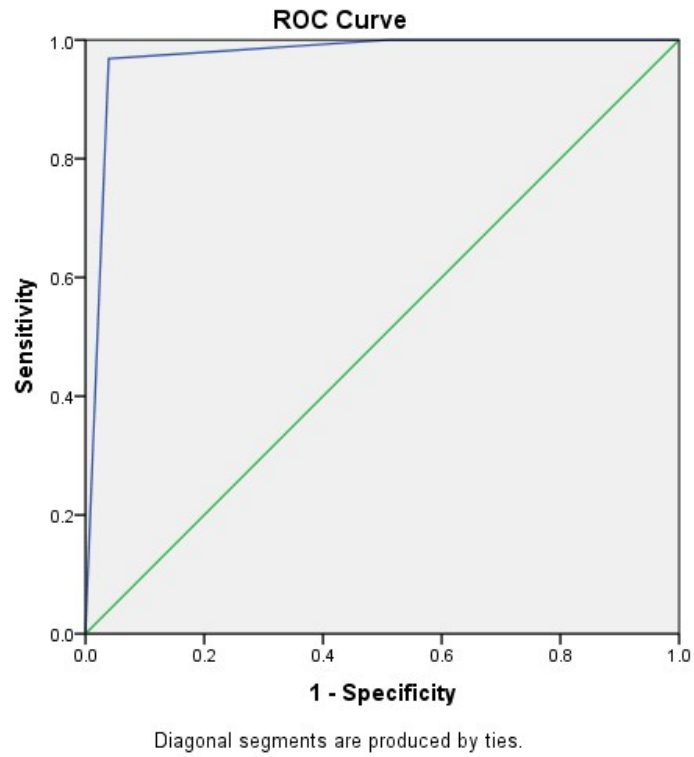

**Fig. S3.** Evaluation of the diagnostic accuracy of the nanosensor in detection of samples with toxic concentration (AP concentration more than 100  $\mu\text{g}/\text{mL}$ ).

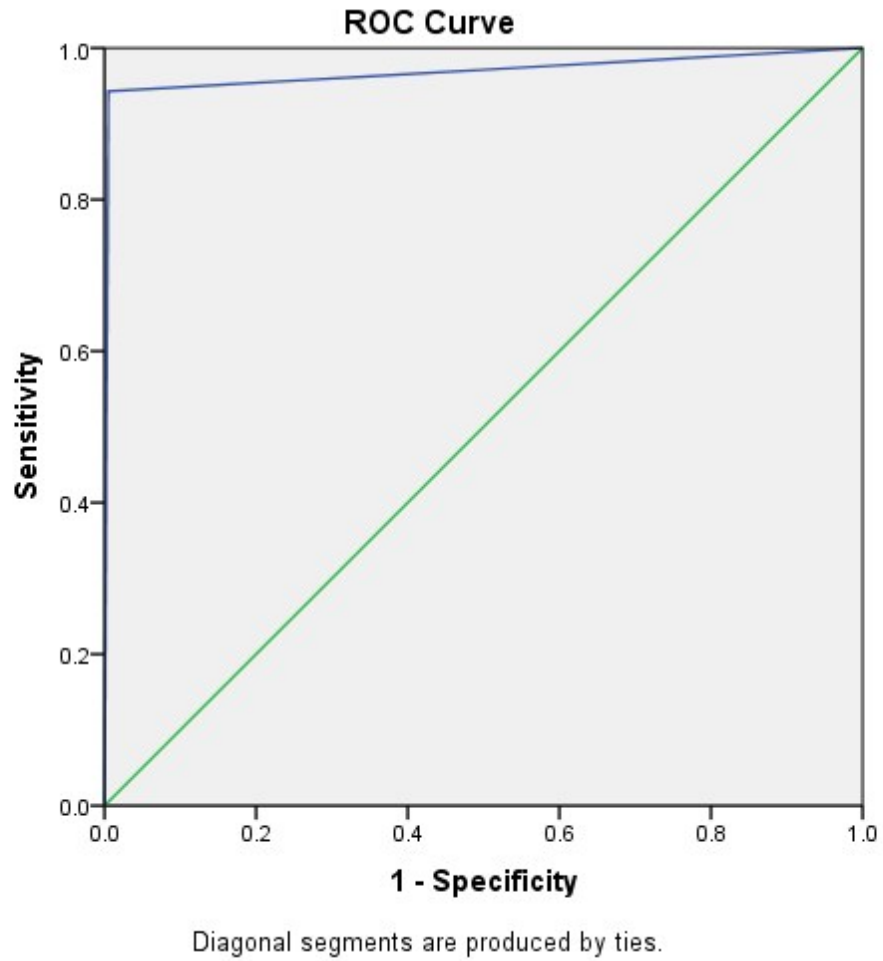

**Fig. S4.** Evaluation of the diagnostic accuracy of the nanosensor in detection of samples with toxic concentration (AP concentration less than 25  $\mu\text{g}/\text{mL}$ ).
